# Supplementary material
Source: PubMed Central journal article supplement (PMC3769927)
Supplement: mmc1.pdf [file mmc1.pdf]

Supplemental Data

Mutations in *IMPG1* Cause Vitelliform Macular Dystrophies

Gaël Manes, Isabelle Meunier, Almudena Avila-Fernández, Sandro Banfi, Guylène Le Meur, Xavier Zanlonghi, Marta Corton, Francesca Simonelli, Philippe Brabet, Gilles Labesse, Isabelle Audo, Saddek Mohand-Said, Christina Zeitz, José-Alain Sahel, Michel Weber, Hélène Dollfus, Claire-Marie Dhaenens, Delphine Allorge, Elfride De Baere, Robert K. Koenekoop, Susanne Kohl, Frans P.M. Cremers, Joe G. Hollyfield, Audrey Sénéchal, Maxime Hebrard, Béatrice Bocquet, Carmen Ayuso García, and Christian P. Hamel

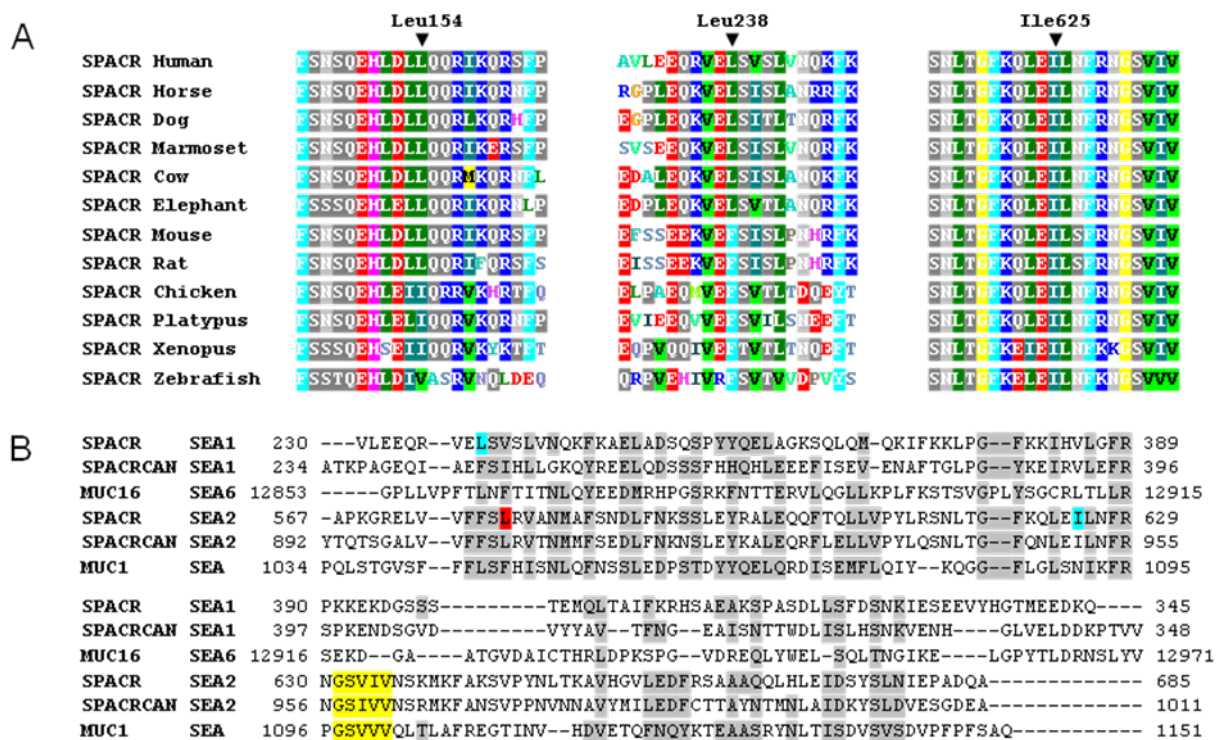

**Figure S1: Amino-acid alignments**

(A) Multiple amino-acid sequence alignment of SPACR for a region surrounding the p.Leu154Pro, p.Leu238Arg and p.Ile625Met missense changes. The site of the mutation is indicated by an arrowhead. (B) Multiple amino-acid sequence alignment of SPACR and SPACRCAN SEA1 and SEA2 domains with the non-proteolytic SEA6 domain of Mucin 16 (Muc16) and the proteolytic SEA domain of Mucin 1. Conserved amino-acids are in grey. Two missense *IMPG1* mutations found in this study are in blue and the missense *IMPG1*

mutation found in BCAMD condition is in red. The consensus sequence for autoproteolysis is in yellow.

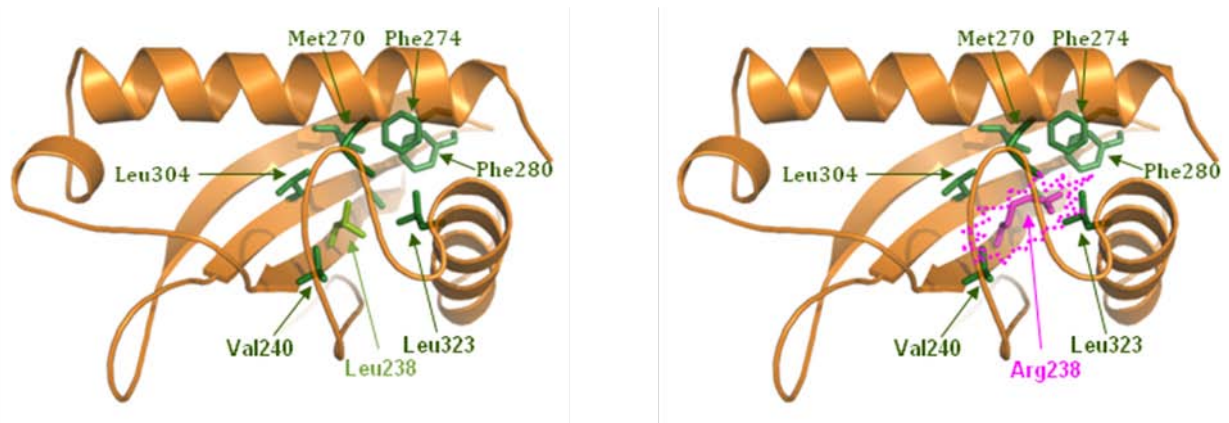

**Figure S2: SPACR SEA1 domain structure**

Three-dimensional model of the N-terminal SEA1 domain of SPACR using Pymol showing  $\alpha$ -helices (helix shape) and  $\beta$ -sheets (ribbon shape). Interactions of wild-type Leu238 (pale green) and mutated Arg238 (flashy pink) with the hydrophobic residues (Val240, Met270, Phe274, Phe280, Leu304, and Leu323) surrounding the position 238 are shown. The highly unfavourable contacts between the polar and charged side-chain of the arginine residue are depicted by the dotted pink line.

A

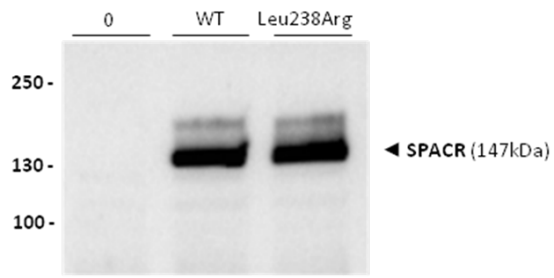

WB: SPACR

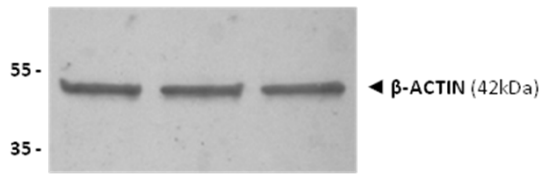

WB:  $\beta$ -ACTIN

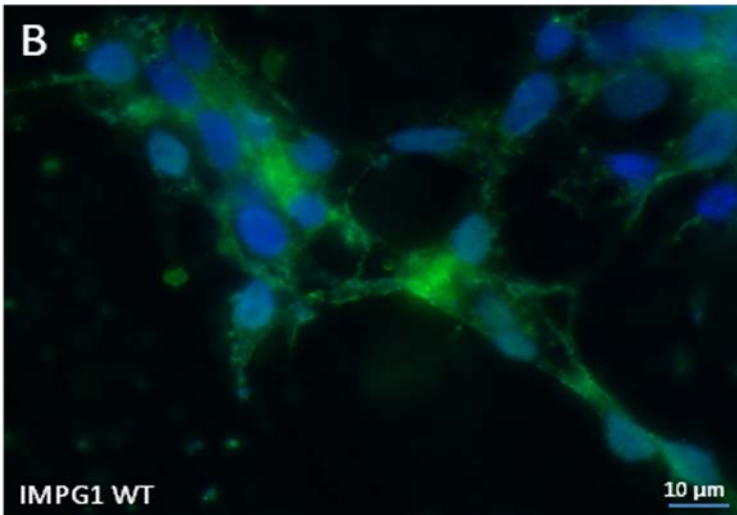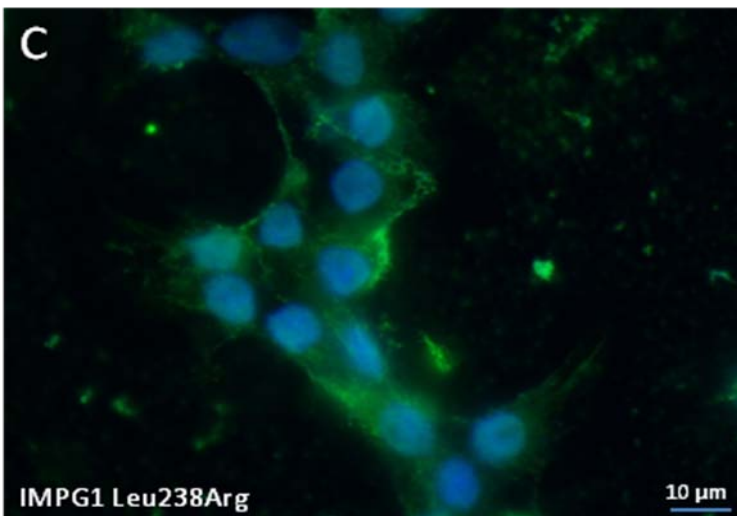

**Figure S3: Characterization of wild-type and p.Leu238Arg mutant SPACR proteins by Western blot analysis and immunofluorescence.**

Cos7 cells were transiently transfected with pRK5 fused in-frame with wild-type (WT) or p.Leu238Arg mutant IMPG1. (A) Protein expression levels of wild-type (WT) and p.Leu238Arg mutant were examined by Western blot. Lane 0, untransfected lysate. SPACR was detected with a rabbit anti-SPACR and an anti-rabbit-HRP antibodies. Beta-Actin was detected with mouse  $\beta$ -Actin and anti-mouse-AP antibodies. Both WT and mutant proteins migrate at the predicted molecular weight of 147 kDa. (B, C) SPACR is stained in green (rabbit anti-SPACR and donkey anti-rabbit Alexa A488), and nuclei are stained in blue (DAPI). Both wild-type (B) and mutant (C) proteins localize to the cytoplasm with the same pattern.

**Table S1: Heterozygous variants common to affected patients on the mapped locus on chromosome 6p12.1-q24.3**

| Position    | Gene           | Type     | Exon | Variation   | EVS       |
|-------------|----------------|----------|------|-------------|-----------|
| 57 398 187  | <i>PRIM2</i>   | indel    | 10   | -/A         | 0/13006   |
| 71 212 388  | <i>FAM135A</i> | missense | 10   | p.Ala308Val | 0/13006   |
| 76 728 529  | <i>IMPG1</i>   | missense | 7    | p.Leu238Arg | 0/13006   |
| 84 798 955  | <i>MRAP2</i>   | missense | 4    | p.Arg125Cys | 6/13006   |
| 88 265 144  | <i>RARS2</i>   | missense | 5    | p.Lys126Arg | 0/13006   |
| 128 134 516 | <i>THEMIS</i>  | missense | 4    | p.Ala389Thr | 117/13006 |
| 148 789 688 | <i>SASH1</i>   | missense | 5    | p.Leu132Val | 12/13006  |

EVS: Exome Variant Server
